# Supplementary material for: Unravelling the structure of the CSD cocrystal network using a fast near-optimal bipartisation algorithm for large networks
Source: Royal Society of Chemistry journal article supplement (doi:10.1039/d3ce00978e), 2023-12-06
Supplement: d3ce00978e1.pdf [file d3ce00978e1.pdf]

The following tables show the cofomers found in the red and yellow clusters described at the end of the results section. Where possible, the CSD refcode is provided. For cofomers that do not have an identifiable refcode, the canonical SMILES code is provided instead.

This table holds the cofomers for the red cluster:

| #  | degree | CSD refcode/canonical SMILES code                                          |
|----|--------|----------------------------------------------------------------------------|
| 1  | 13     | DOCDAC                                                                     |
| 2  | 10     | AMXBPM10                                                                   |
| 3  | 9      | <chem>Fc1c(F)c(C(=O)O)c(c(c1Br)F)F</chem>                                  |
| 4  | 9      | TEKKUP                                                                     |
| 5  | 8      | ETYNBZ                                                                     |
| 6  | 8      | <chem>Oc1c(F)c(F)c(c(c1F)F)I</chem>                                        |
| 7  | 7      | <chem>Fc1cc(F)c(c(c1F)I)F</chem>                                           |
| 8  | 7      | DNEDAM                                                                     |
| 9  | 7      | <chem>Oc1c(F)c(F)c(c(c1F)F)Br</chem>                                       |
| 10 | 7      | <chem>OC(=O)[C@@H]1C[C@@H](C[C@@H](C1)C(=O)O)C(=O)O</chem>                 |
| 11 | 7      | <chem>Oc1cc(cc(c1)O)c1c2ccccc2c(c2c1cccc2)c1cc(O)cc(c1)O</chem>            |
| 12 | 6      | KOFJUK                                                                     |
| 13 | 6      | DOCCOP                                                                     |
| 14 | 6      | VITKAL                                                                     |
| 15 | 6      | NAPHOL                                                                     |
| 16 | 6      | NOMBEA                                                                     |
| 17 | 5      | AWEXOQ                                                                     |
| 18 | 5      | WEBNUO                                                                     |
| 19 | 5      | WEBMIB                                                                     |
| 20 | 5      | <chem>IC#Cc1cccc2c1cc1c(ccc1c2)C#CI</chem>                                 |
| 21 | 5      | EGEPEO                                                                     |
| 22 | 5      | AJEYAQ                                                                     |
| 23 | 5      | <chem>Oc1ccc(cc1)[C@@]12C[C@H]3C[C@@H](C1)C[C@@](C2)(C3)c1ccc(cc1)O</chem> |
| 24 | 5      | <chem>Nc1ccc(cc1)/N=N/c1cccc1</chem>                                       |
| 25 | 4      | TELXAJ                                                                     |
| 26 | 4      | SILGOK                                                                     |
| 27 | 4      | <chem>IC#Cc1cccc1C#CI</chem>                                               |
| 28 | 4      | WEBNOI                                                                     |
| 29 | 4      | WEBMUN                                                                     |
| 30 | 4      | WEBNAU                                                                     |

|    |   |                                                                                    |
|----|---|------------------------------------------------------------------------------------|
| 31 | 4 | WEBMOH                                                                             |
| 32 | 4 | PIDGOZ                                                                             |
| 33 | 4 | TETBBZ22                                                                           |
| 34 | 4 | VITJUE                                                                             |
| 35 | 4 | VAMBOA                                                                             |
| 36 | 4 | <chem>C[Te]C#Cc1cccc2c1cc1c(ccc1c2)C#C[Te]C</chem>                                 |
| 37 | 4 | RIJHIE                                                                             |
| 38 | 4 | ZEHGEY                                                                             |
| 39 | 4 | <chem>N#Cc1cc(O)cc(c1)O</chem>                                                     |
| 40 | 4 | TICHUI                                                                             |
| 41 | 4 | IKACUT                                                                             |
| 42 | 4 | GIMBOT                                                                             |
| 43 | 4 | <chem>Oc1ccc(cc1Sc1cc(Cl)ccc1O)Cl</chem>                                           |
| 44 | 4 | OHADAD                                                                             |
| 45 | 4 | GUWCOQ                                                                             |
| 46 | 4 | PEXBZA                                                                             |
| 47 | 4 | MAMPOL                                                                             |
| 48 | 4 | WINWUL                                                                             |
| 49 | 4 | SAFNIW                                                                             |
| 50 | 3 | <chem>CC(=O)c1c(O)cc(cc1O)O</chem>                                                 |
| 51 | 3 | JOQKEF                                                                             |
| 52 | 3 | CROTAC                                                                             |
| 53 | 3 | BIFFAZ                                                                             |
| 54 | 3 | TERRUD01                                                                           |
| 55 | 3 | UNADUK                                                                             |
| 56 | 3 | PEYRAP                                                                             |
| 57 | 3 | WEBNEY                                                                             |
| 58 | 3 | IKAYEZ                                                                             |
| 59 | 3 | <chem>OC(=O)COc1cccc(c1)C(=O)O</chem>                                              |
| 60 | 3 | <chem>CC([Si](c1cc(cc(c1)[Si](C(C)C)(C(C)C)O)[Si](C(C)C)(C(C)C)O)(C(C)C)O)C</chem> |
| 61 | 3 | DOCCUV                                                                             |
| 62 | 3 | ATUVIU                                                                             |
| 63 | 3 | XAPVOA                                                                             |
| 64 | 3 | <chem>OC(=O)[C@@H]1[C@@H](C(=O)O)[C@@H]2c3c([C@H]1c1c2cccc1)cccc3</chem>           |

|    |   |                                                                                |
|----|---|--------------------------------------------------------------------------------|
| 65 | 3 | TUVXAM                                                                         |
| 66 | 3 | DOYJEH                                                                         |
| 67 | 3 | QQQBSS01                                                                       |
| 68 | 3 | <chem>OC(=O)c1c[nH]c(=O)[nH]c1=O</chem>                                        |
| 69 | 3 | TAJPAW                                                                         |
| 70 | 3 | MIQVUF                                                                         |
| 71 | 3 | ABEGEU                                                                         |
| 72 | 3 | <chem>IC#Cc1cccc(c1)N(=O)=O</chem>                                             |
| 73 | 3 | <chem>IC#Cc1ccc(cc1)I</chem>                                                   |
| 74 | 3 | BUXBZA                                                                         |
| 75 | 3 | ZZZLAO10                                                                       |
| 76 | 3 | <chem>IC#C[C@@]1(O)CC[C@](CC1)(O)C#CI</chem>                                   |
| 77 | 3 | HIXVIW                                                                         |
| 78 | 3 | <chem>O=C(c1c(F)c(F)c(c(c1F)F)I)Nc1c(F)c(F)c(c(c1F)F)Br</chem>                 |
| 79 | 3 | <chem>OC(=O)c1ccc(cc1)Oc1nc(nc(n1)Oc1ccc(cc1)C(=O)O)Oc1ccc(cc1)C(=O)O</chem>   |
| 80 | 3 | <chem>Oc1ccc(cc1Cl)[C@]12C[C@@H]3C[C@H](C1)C[C@](C2)(C3)c1ccc(c(c1)Cl)O</chem> |
| 81 | 3 | DEBJUQ                                                                         |
| 82 | 3 | IMOQIN                                                                         |
| 83 | 3 | LURNOB                                                                         |
| 84 | 3 | WUMHAQ01                                                                       |
| 85 | 3 | <chem>Fc1cc(F)c(c(c1F)Br)F</chem>                                              |
| 86 | 3 | SULDAZ                                                                         |
| 87 | 3 | ETERYUX02                                                                      |
| 88 | 3 | PAXNIL                                                                         |
| 89 | 2 | <chem>O[C@H]([C@@H](C(O)O)O)C(O)O</chem>                                       |
| 90 | 2 | VAPBIY                                                                         |
| 91 | 2 | WIGPUZ                                                                         |
| 92 | 2 | <chem>Clc1c(Cl)c(Cl)c(c(c1Cl)I)I</chem>                                        |
| 93 | 2 | <chem>Br1cc(Br)c(c(c1)Br)O</chem>                                              |
| 94 | 2 | <chem>CCc1c(C(=O)O)c(CC)c(c(c1C(=O)O)CC)C(=O)O</chem>                          |
| 95 | 2 | <chem>N#C[Se]CC#CC#CC[Se]C#N</chem>                                            |
| 96 | 2 | UYIREB                                                                         |
| 97 | 2 | UYIRAX                                                                         |
| 98 | 2 | BOLNEW                                                                         |

|     |   |                                                                                                                                                                                                                                   |
|-----|---|-----------------------------------------------------------------------------------------------------------------------------------------------------------------------------------------------------------------------------------|
| 99  | 2 | FESNOG                                                                                                                                                                                                                            |
| 100 | 2 | OC(=O)c1ccc(c(c1)C(=O)O)O                                                                                                                                                                                                         |
| 101 | 2 | F[C@@H]1[C@H](Br)[C@@H](F)[C@H]([C@H]([C@@H]1F)Br)F                                                                                                                                                                               |
| 102 | 2 | F[C@H]1[C@@H](Br)[C@H](F)[C@@H]([C@@H]([C@H]1F)Br)F                                                                                                                                                                               |
| 103 | 2 | WEBNIC                                                                                                                                                                                                                            |
| 104 | 2 | Cl[C@@H]1[C@H](I)[C@@H](Cl)[C@H]([C@H]([C@@H]1Cl)I)Cl                                                                                                                                                                             |
| 105 | 2 | SUGYEZ                                                                                                                                                                                                                            |
| 106 | 2 | DOCCEF                                                                                                                                                                                                                            |
| 107 | 2 | PUYTEI                                                                                                                                                                                                                            |
| 108 | 2 | KEQTIL                                                                                                                                                                                                                            |
| 109 | 2 | OC(=O)CCC[Si](O[Si](CCCC(=O)O)(C)C)(C)C                                                                                                                                                                                           |
| 110 | 2 | C#CCCCC(=O)O                                                                                                                                                                                                                      |
| 111 | 2 | BOXMUZ                                                                                                                                                                                                                            |
| 112 | 2 | IHAHIL                                                                                                                                                                                                                            |
| 113 | 2 | HIHJIR                                                                                                                                                                                                                            |
| 114 | 2 | MAGHIO                                                                                                                                                                                                                            |
| 115 | 2 | C#C[C@@]1(O)CC[C@](CC1)(O)C#C                                                                                                                                                                                                     |
| 116 | 2 | TOYPUS                                                                                                                                                                                                                            |
| 117 | 2 | WACJUF                                                                                                                                                                                                                            |
| 118 | 2 | OJURAO                                                                                                                                                                                                                            |
| 119 | 2 | OC(=O)c1cc(O)c(c(c1)O)Br                                                                                                                                                                                                          |
| 120 | 2 | C[Te]C#Cc1c(F)c(F)c(c(c1F)F)C#C[Te]C                                                                                                                                                                                              |
| 121 | 2 | IMOQOT                                                                                                                                                                                                                            |
| 122 | 2 | ADOGUW                                                                                                                                                                                                                            |
| 123 | 2 | PINPIL01                                                                                                                                                                                                                          |
| 124 | 2 | IGALUY                                                                                                                                                                                                                            |
| 125 | 2 | OJIHAQ                                                                                                                                                                                                                            |
| 126 | 2 | C[C@@]12CC[C@@](c3c1cc(O)c(c3)O)(c1c2cc(O)c(c1)O)C                                                                                                                                                                                |
| 127 | 2 | C[C@H]1c2cc(c(cc2O)O)[C@@H](C)c2cc(c(cc2O)O)[C@@H](c2cc([C@@H](c3cc1c(O)cc3O)C)c(O)cc2O)C                                                                                                                                         |
| 128 | 2 | FC(C(C(C(C(I)(F)F)(F)F)(F)F)(F)F)(C(C(C(C(C(I)(F)F)(F)F)(F)F)(F)F)(F)F)F                                                                                                                                                          |
| 129 | 2 | Fc1c(OCc2ccc(cc2)OP2(=NP(=NP(=N2)(Oc2ccc(cc2)COc2c(F)c(F)c(c(c2F)F)I)Oc2ccc(cc2)COc2c(F)c(F)c(c(c2F)F)I)(Oc2ccc(cc2)COc2c(F)c(F)c(c(c2F)F)I)Oc2ccc(cc2)COc2c(F)c(F)c(c(c2F)F)I)Oc2ccc(cc2)COc2c(F)c(F)c(c(c2F)F)I)c(F)c(c(c1F)I)F |
| 130 | 2 | POXYEH                                                                                                                                                                                                                            |
| 131 | 2 | FEDHUU                                                                                                                                                                                                                            |

|     |   |                                                                   |
|-----|---|-------------------------------------------------------------------|
| 132 | 2 | GEMXEB                                                            |
| 133 | 2 | UHELOI                                                            |
| 134 | 2 | RASCEU                                                            |
| 135 | 2 | <chem>Oc1cc2O[C@H](c3cc(O)c(c(c3)O)O)[C@H](C(=O)c2c(c1)O)O</chem> |
| 136 | 2 | OTATAF                                                            |

This table holds the cofomers for the yellow cluster:

| #  | degree | CSD refcode/canonical SMILES code                                                      |
|----|--------|----------------------------------------------------------------------------------------|
| 1  | 18     | PENDAM                                                                                 |
| 2  | 17     | AZSTBA                                                                                 |
| 3  | 16     | CICYOD                                                                                 |
| 4  | 15     | <chem>O=C1N(c2ccncc2)C(=O)c2c3c1ccc1c3c(cc2)C(=O)N(C1=O)c1ccncc1</chem>                |
| 5  | 12     | OWOHAL                                                                                 |
| 6  | 12     | GURCOL                                                                                 |
| 7  | 10     | LIZCUS                                                                                 |
| 8  | 9      | QARYEO                                                                                 |
| 9  | 9      | PHENAT                                                                                 |
| 10 | 8      | <chem>CC(=O)c1ccncc1</chem>                                                            |
| 11 | 8      | PYRBTA                                                                                 |
| 12 | 8      | <chem>O=N(=O)c1ccc(cc1)C(c1ccc(cc1)N(=O)=O)(c1ccc(cc1)N(=O)=O)c1ccc(cc1)N(=O)=O</chem> |
| 13 | 8      | EDEQAG                                                                                 |
| 14 | 8      | <chem>c1ccc(cn1)c1ncc[nH]1</chem>                                                      |
| 15 | 7      | TPPOSS                                                                                 |
| 16 | 7      | <chem>n1ccc(cc1)/C=C/c1cccn1</chem>                                                    |
| 17 | 7      | WEFBOZ                                                                                 |
| 18 | 7      | VIQBOM                                                                                 |
| 19 | 7      | GENYIH                                                                                 |
| 20 | 7      | <chem>BrC1cnc(c(n1)Br)N</chem>                                                         |
| 21 | 6      | TPPHSE                                                                                 |
| 22 | 6      | <chem>Cc1cc2ncn(c2cc1C)Cc1ccncc1</chem>                                                |
| 23 | 6      | JEHGUB                                                                                 |
| 24 | 6      | <chem>Cc1cc2ncn(c2cc1C)Cc1ccncc1</chem>                                                |
| 25 | 6      | RIBGIS                                                                                 |
| 26 | 6      | <chem>CN1CCC[C@H]1c1ccncc1</chem>                                                      |
| 27 | 6      | <chem>n1ccc(cc1)c1ccc(s1)c1cco1</chem>                                                 |
| 28 | 5      | <chem>CNC(=S)NC</chem>                                                                 |
| 29 | 5      | <chem>O/C(=C\C(=O)c1ccccc1)/c1ccncc1</chem>                                            |
| 30 | 5      | <chem>O=C(NC1ccncc1)NC1ccncc1</chem>                                                   |
| 31 | 5      | YIJBEZ                                                                                 |
| 32 | 5      | VAPPIP                                                                                 |
| 33 | 5      | KAQCAJ                                                                                 |

|    |   |                                                                    |
|----|---|--------------------------------------------------------------------|
| 34 | 5 | DPHDSE                                                             |
| 35 | 5 | IVEJUO                                                             |
| 36 | 5 | COUMAR01                                                           |
| 37 | 5 | <chem>n1ccc(cc1)c1ccc(s1)c1cccs1</chem>                            |
| 38 | 4 | <chem>c1ccc(cn1)Cn1cnc2c1ccccc2</chem>                             |
| 39 | 4 | <chem>ON1C(=C(C)N(C(=C1C)C)O)C</chem>                              |
| 40 | 4 | <chem>Cc1cc(C)cc(c1N#C)C</chem>                                    |
| 41 | 4 | POWGEG                                                             |
| 42 | 4 | <chem>CC(=O)NCc1ccncc1</chem>                                      |
| 43 | 4 | HAKNAJ                                                             |
| 44 | 4 | HUVHAJ                                                             |
| 45 | 4 | SUSWUB                                                             |
| 46 | 4 | YADJIY                                                             |
| 47 | 4 | MANTHR01                                                           |
| 48 | 4 | WIZFOA                                                             |
| 49 | 4 | OKILEB                                                             |
| 50 | 4 | HEQXOR                                                             |
| 51 | 4 | NEXBOI                                                             |
| 52 | 4 | FINNEW                                                             |
| 53 | 3 | PACLAK                                                             |
| 54 | 3 | QESZUK                                                             |
| 55 | 3 | <chem>c1ccc(cc1)c1ncn1Cc1ccncc1</chem>                             |
| 56 | 3 | CIJXAX                                                             |
| 57 | 3 | <chem>c1ccc(cn1)c1cc(c2ccncc2)c(cc1c1ccncc1)c1ccncc1</chem>        |
| 58 | 3 | GUQYID                                                             |
| 59 | 3 | C1CCSCS1                                                           |
| 60 | 3 | <chem>Cc1nc(nc(c1)C)c1nc(C)cc(n1)C</chem>                          |
| 61 | 3 | SLCPYA                                                             |
| 62 | 3 | ZEFHOK                                                             |
| 63 | 3 | RECFIS                                                             |
| 64 | 3 | CEQVAY                                                             |
| 65 | 3 | <chem>[H]1[S@]23N41[CH2]2[CH2]1[S@@]25[CH2]([CH2]34)N12[H]5</chem> |
| 66 | 3 | DPHSOX03                                                           |
| 67 | 3 | CNITBZ02                                                           |

|     |   |                                                                                   |
|-----|---|-----------------------------------------------------------------------------------|
| 68  | 3 | BERTIB                                                                            |
| 69  | 3 | <chem>Nc1ncc(nc1)Br</chem>                                                        |
| 70  | 3 | SOBKOL                                                                            |
| 71  | 3 | JULZAR                                                                            |
| 72  | 3 | ZORSEG                                                                            |
| 73  | 3 | <chem>c1ccc2c(c1)ccc1c2nccc1</chem>                                               |
| 74  | 3 | <chem>C=Cc1ccncc1</chem>                                                          |
| 75  | 3 | BEYGUK                                                                            |
| 76  | 3 | OFIZEK                                                                            |
| 77  | 3 | <chem>n1ccc(cc1)Cn1cncc1</chem>                                                   |
| 78  | 3 | <chem>ON1C(=N(C(C1(C)C)(C)C)O)c1cccc1</chem>                                      |
| 79  | 3 | LIDCAN10                                                                          |
| 80  | 3 | <chem>Cc1ccc(cc1)C(=O)C</chem>                                                    |
| 81  | 3 | NERDUN                                                                            |
| 82  | 3 | WIFKIF                                                                            |
| 83  | 3 | <chem>O=C1N2Cc3cccc(n3)CN3CN(CN(Cc4nc(CN1CN(C2)C(C)(C)C)ccc4)C3=O)C(C)(C)C</chem> |
| 84  | 2 | RIVPOE                                                                            |
| 85  | 2 | <chem>CC(=O)c1ccncc1</chem>                                                       |
| 86  | 2 | YIZZIT                                                                            |
| 87  | 2 | <chem>Clc1ccc2c(n1)c1ncccc1cc2</chem>                                             |
| 88  | 2 | <chem>C/C(=C/C(=O)C)/NCCN1CCNCC1</chem>                                           |
| 89  | 2 | <chem>C/C(=C/C(=O)C)/NCCN1CCOCC1</chem>                                           |
| 90  | 2 | <chem>C/C(=C/C(=O)c1cccc1)/NCCN1CCNCC1</chem>                                     |
| 91  | 2 | BENJUD                                                                            |
| 92  | 2 | PACNEQ                                                                            |
| 93  | 2 | TASKIL                                                                            |
| 94  | 2 | <chem>NN1CCOCC1</chem>                                                            |
| 95  | 2 | DADMBP                                                                            |
| 96  | 2 | <chem>O1CCN(CC1)CCN=C1CCSCC1</chem>                                               |
| 97  | 2 | OWEKEH                                                                            |
| 98  | 2 | BENLUD                                                                            |
| 99  | 2 | <chem>c1ccc2n(c1)nnc2</chem>                                                      |
| 100 | 2 | NEDXAX                                                                            |
| 101 | 2 | <chem>Cc1cc(c(cc1c1ccc(cc1)c1cc(C)c(cc1C)c1cncc1)C)c1cncc1</chem>                 |



|     |   |                                                                                                |
|-----|---|------------------------------------------------------------------------------------------------|
| 102 | 2 | DMHTEZ10                                                                                       |
| 103 | 2 | SUBTIS01                                                                                       |
| 104 | 2 | FEXRIK                                                                                         |
| 105 | 2 | <chem>n1cc(cc(c1)c1ccncc1)c1cncnc1</chem>                                                      |
| 106 | 2 | KENDOA                                                                                         |
| 107 | 2 | C1CNCCS1                                                                                       |
| 108 | 2 | VAZMOB                                                                                         |
| 109 | 2 | <chem>COc1cccc(c1O)/C=N/c1ccc(cc1)C#N</chem>                                                   |
| 110 | 2 | EXUPOE                                                                                         |
| 111 | 2 | EHELOT                                                                                         |
| 112 | 2 | WIFXIU                                                                                         |
| 113 | 2 | DIXREH                                                                                         |
| 114 | 2 | CASHOT                                                                                         |
| 115 | 2 | ATAKOY                                                                                         |
| 116 | 2 | <chem>c1ccc(en1)c1ccc(cc1)C(=C(c1ccc(cc1)c1ccncc1)c1ccc(cc1)c1ccncc1)c1ccc(cc1)c1ccncc1</chem> |
| 117 | 2 | <chem>c1cnc2c(c1)nc[nH]2</chem>                                                                |
| 118 | 2 | PAPSEG                                                                                         |
| 119 | 2 | TEHZIP                                                                                         |
| 120 | 2 | <chem>CCCCC1ccc(cc1)C#Cc1cncnc1</chem>                                                         |
| 121 | 2 | PUQYEH                                                                                         |
| 122 | 2 | <chem>c1ccc(en1)Cn1cnc1</chem>                                                                 |
| 123 | 2 | <chem>COc1cnc(c1)C#Cc1cncnc1</chem>                                                            |
| 124 | 2 | ZOHFEK                                                                                         |
| 125 | 2 | NIQDOG                                                                                         |
| 126 | 2 | AMIPYR                                                                                         |
| 127 | 2 | HIWLEH                                                                                         |
| 128 | 2 | VABDOR                                                                                         |
| 129 | 2 | <chem>n1ccc(cc1)/C=C/c1cccc2c1cccc2</chem>                                                     |
| 130 | 2 | IQUGUY                                                                                         |
| 131 | 2 | <chem>Cc1cnc2c1ccc1c2nccc1C</chem>                                                             |
| 132 | 2 | XECYEM                                                                                         |
| 133 | 2 | JITPIL                                                                                         |
| 134 | 2 | AMACPH                                                                                         |
| 135 | 2 | SEUREA                                                                                         |

|     |   |                                                                    |
|-----|---|--------------------------------------------------------------------|
| 136 | 2 | OLUNOA                                                             |
| 137 | 2 | FOFDIN                                                             |
| 138 | 2 | DPHDTE                                                             |
| 139 | 2 | EHUKIC                                                             |
| 140 | 2 | <chem>n1ccc(cc1)Cn1cnc2c1cccc2</chem>                              |
| 141 | 2 | NMKPIP                                                             |
| 142 | 2 | <chem>COc1cc(C=O)cc(c1Br)OC</chem>                                 |
| 143 | 2 | CALXEW                                                             |
| 144 | 2 | <chem>[H]1[O@]23N41[CH2]2[CH2]1[O@@]25[CH2]([CH2]34)N12[H]5</chem> |
| 145 | 2 | TUDHAE                                                             |
| 146 | 2 | MESITN                                                             |
| 147 | 2 | <chem>[S-]C1=CC[NH+](C=C1)c1ccncc1</chem>                          |
